# Supplementary material for: Elevated serum gamma globulins in apparently healthy Nigerians living in Ogbomoso: a possible manifestation of phagocytic dysfunction
Source: Atypon-hosted journal article supplement (doi:10.14785/lymphosign-2021-0024), 2021-08-27
Supplement: lymphosign-2021-0024suppla.pdf [file lymphosign-2021-0024suppla.pdf]

**LADOKE AKINTOLA UNIVERSITY OF TECHNOLOGY, OGBOMOSO**

**Questionnaire on hypergammaglobulinemia in apparently healthy humans**

*(Please note that your information will be handled with almost confidentiality)*

**Participant ID:** \_\_\_\_\_

**Personal Information:**

Name: \_\_\_\_\_

Address / Department: \_\_\_\_\_

Phone number: \_\_\_\_\_ Date of Birth: \_\_\_\_/\_\_\_\_/\_\_\_\_

Gender: Male  Female  Marital status: Single  Married

LMP \_\_\_\_\_  Graduate  Undergraduate

**Medical Information:**

Blood Group: A  B  AB  O  Rh Neg  Pos

RVS:(if known): Yes  No

HB Genotype (if known): AA  AS  AC  SS  SC  CC

Weight [Kg]: \_\_\_\_\_

Height [m]: \_\_\_\_\_

|                         | <b>Present</b>               |                             | <b>Past</b>                  |                             |
|-------------------------|------------------------------|-----------------------------|------------------------------|-----------------------------|
| Smoking Habit           | YES <input type="checkbox"/> | NO <input type="checkbox"/> | YES <input type="checkbox"/> | NO <input type="checkbox"/> |
| Alcohol/Substance Abuse | YES <input type="checkbox"/> | NO <input type="checkbox"/> | YES <input type="checkbox"/> | NO <input type="checkbox"/> |
| Recurrent Fever         | YES <input type="checkbox"/> | NO <input type="checkbox"/> | YES <input type="checkbox"/> | NO <input type="checkbox"/> |
| Recurrent Infections    | YES <input type="checkbox"/> | NO <input type="checkbox"/> | YES <input type="checkbox"/> | NO <input type="checkbox"/> |
| Joint Pain              | YES <input type="checkbox"/> | NO <input type="checkbox"/> | YES <input type="checkbox"/> | NO <input type="checkbox"/> |
| Skin Problem            | YES <input type="checkbox"/> | NO <input type="checkbox"/> | YES <input type="checkbox"/> | NO <input type="checkbox"/> |
| Others _____            | YES <input type="checkbox"/> | NO <input type="checkbox"/> | YES <input type="checkbox"/> | NO <input type="checkbox"/> |

**Informed Consent:**

I consent to participate in this research. I understand that the sample (blood/urine) collected will be used primarily for Final Year Project.

I, \_\_\_\_\_ agreed to donate blood/ urine willingly for this biomedical research purposes.

\_\_\_\_\_

Signature

\_\_\_\_\_

Date
